# Supplementary material for: Subnanometric Pt clusters supported on MgO-incorporated porous carbon as efficient metal–base bifunctional catalysts for reductive heterocyclization reactions
Source: Royal Society of Chemistry journal article supplement (doi:10.1039/d2gc04091c), 2023-01-01
Supplement: d2gc04091c1.pdf [file d2gc04091c1.pdf]

## Electronic Supplementary Information

**Subnanometric Pt clusters supported on MgO-incorporated porous carbon as an efficient metal-base bifunctional catalyst for reductive heterocyclization reactions**

Yaping Song,<sup>a#</sup> Ruifang Xue,<sup>a#</sup> Li Wang,<sup>a</sup> Nan Li,<sup>a</sup> Zhijun Fang,<sup>a</sup> Yanghe Fu,<sup>a, b</sup> De-Li Chen,<sup>a, b\*</sup> Weidong Zhu,<sup>a, b\*</sup> and Fumin Zhang<sup>a, b\*</sup>

<sup>a</sup>Key Laboratory of the Ministry of Education for Advanced Catalysis Materials, Institute of Physical Chemistry, Zhejiang Normal University, Jinhua 321004, People's Republic of China

<sup>b</sup>Zhejiang Engineering Laboratory for Green Syntheses and Applications of Fluorine-Containing Specialty Chemicals, Institute of Advanced Fluorine-Containing Materials, Zhejiang Normal University, Jinhua 321004, People's Republic of China

<sup>#</sup>These authors contributed equally to this work

**\*Corresponding Authors:**

De-Li Chen: chendl@zjnu.cn;

Weidong Zhu: weidongzhu@zjnu.cn;

Fumin Zhang: zhangfumin@zjnu.edu.cn

**Table S1** Pt and Mg loadings as well as the textural properties of various catalysts investigated

| Sample                            | $S_{\text{BET}}^a$ (m <sup>2</sup> /g) | $V_{\text{total}}^b$ (cm <sup>3</sup> /g) | Pt loading <sup>c</sup><br>(wt%) | Mg loading <sup>c</sup><br>(wt%) |
|-----------------------------------|----------------------------------------|-------------------------------------------|----------------------------------|----------------------------------|
| Pt/MgO@C                          | 614.4                                  | 0.82                                      | 0.078                            | 20.57                            |
| Pt/MgO                            | 57.6                                   | 0.36                                      | 0.075                            | -                                |
| Pt/C                              | 851.9                                  | 0.49                                      | 0.079                            | -                                |
| Pt/Al <sub>2</sub> O <sub>3</sub> | 15.6                                   | 0.13                                      | 0.095                            | -                                |
| Pt/SiO <sub>2</sub>               | 238.6                                  | 1.52                                      | 0.080                            | -                                |
| Pt/C + MgO                        | 532.5                                  | 0.46                                      | 0.079                            | -                                |

<sup>a</sup>By BET method. <sup>b</sup>By *t*-plot method. <sup>c</sup>By ICP–AES analysis.

**Table S2** Catalytic performance of Pt/MgO@C for the reductive heterocyclization of 2-nitrobenzaldehyde with different solvent

| Entry          | Solvent               | Time (h) | Con. (%) | Sel. (%) | TOF <sup>a</sup> (h <sup>-1</sup> ) |
|----------------|-----------------------|----------|----------|----------|-------------------------------------|
| 1              | Toluene               | 6        | ≥99      | 98.5     | 240                                 |
| 2              | MeOH                  | 8        | ≥99      | 95.7     | 210                                 |
| 3              | THF                   | 6        | 11       | 83.9     | 18.3                                |
| 4 <sup>b</sup> | H <sub>2</sub> O      | 10       | 22       | 85.9     | 22                                  |
| 5              | EtOH                  | 5.5      | ≥99      | 94.8     | 266.7                               |
| 6              | EtOH/H <sub>2</sub> O | 3        | ≥99      | 91.9     | 285                                 |

(V/V=1:1)

**Reaction conditions:** catalyst (50 mg, 0.1 mol%), 2-nitrobenzaldehyde (0.2 mmol), solvent (3 mL), 303 K, H<sub>2</sub> (1 bar in balloon). <sup>a</sup>TOF values were calculated as the number of moles of 2,1-benzisoxazole produced by per mole of Pt sites per hour. <sup>b</sup>2-Nitrobenzaldehyde is partially soluble in water.

**Table S3** Comparison of the performance of the reductive heterocyclization of 2-nitrobenzaldehyde in the literature

| Entry | Catalyst                                | Solvent                            | Temp.<br>(K) | Time<br>(h) | Yield<br>(%) | Ref.      |
|-------|-----------------------------------------|------------------------------------|--------------|-------------|--------------|-----------|
| 1     | Pt/MgO@C                                | Toluene                            | 303          | 6           | 98.5         | This work |
| 2     | BNP (2 equiv)/In (5 equiv)              | MeOH/H <sub>2</sub> O<br>(V/V=1:2) | 323          | 0.17        | 93           | [S1]      |
| 3     | In (3 equiv)/I <sub>2</sub> (0.8 equiv) | MeOH                               | 323          | 1.5         | 87           | [S2]      |
| 4     | SnCl <sub>2</sub> ·2H <sub>2</sub> O    | EtOAc/MeOH<br>(V/V=1:1)            | 298          | 20          | 86           | [S3]      |
| 5     | Ir60 : G6/SiO <sub>2</sub>              | Toluene                            | 303          | 1           | 41           | [S4]      |
| 6     | Pt/MgO                                  | Toluene                            | 303          | 1           | 94           | [S5]      |
| 7     | Pt/c-C                                  | MeOH                               | 303          | 3           | 92           | [S6]      |

## Reference

[S1] B. H. Kim, Y. Jin, Y. M. Jun, R. B. Han, W. Baik and B. M. Lee, *Tetrahedron Lett.*, 2000, **41**, 2137–2140.

[S2] R. B. Han, K. I. Son, G. H. Ahn, Y. M. Jun, B. M. Lee, Y. Park and B. H. Kim, *Tetrahedron Lett.*, 2006, **47**, 7295–7299.

[S3] J. Chauhan and S. Fletcher, *Tetrahedron Lett.*, 2012, **53**, 4951–4954.

[S4] T. Higaki, H. Kitazawa, S. Yamazoe and T. Tsukuda, *Nanoscale*, 2016, **8**, 11371–11374.

[S5] L. Marti, L. M. Sanchez, M. J. Climent, A. Corma, S. Iborra, G. P. Romanelli and P. Concepcion, *ACS Catal.*, 2017, **7**, 8255–8262.

[S6] Y. Y. Wu, Y. F. Zhao, H. Wang, F. T. Zhang, R. P. Li, J. F. Xiang, Z. P. Wang, B. X. Han and Z. M. Liu, *Green Chem.*, 2020, **22**, 3820–3826.

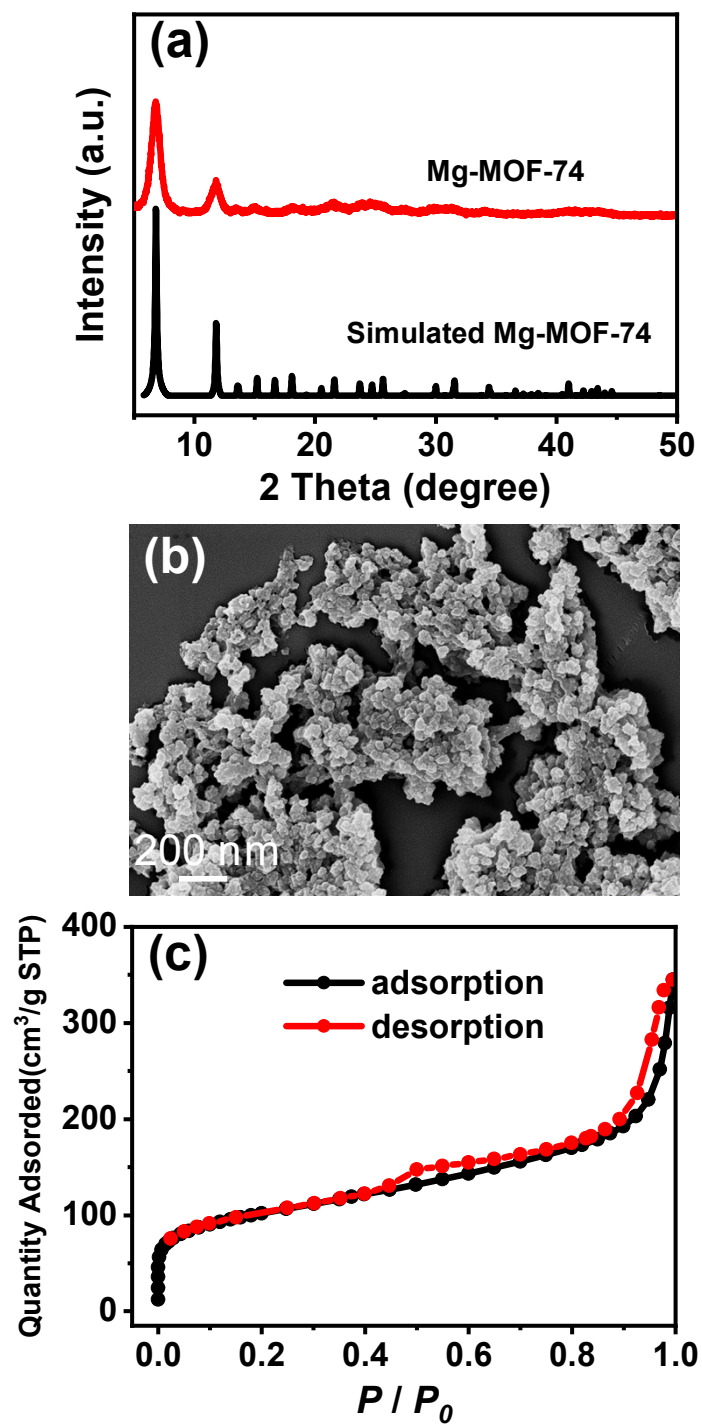

**Figure S1** XRD pattern (a), SEM (b), and N<sub>2</sub> adsorption–desorption isotherms (c) of Mg-MOF-74.

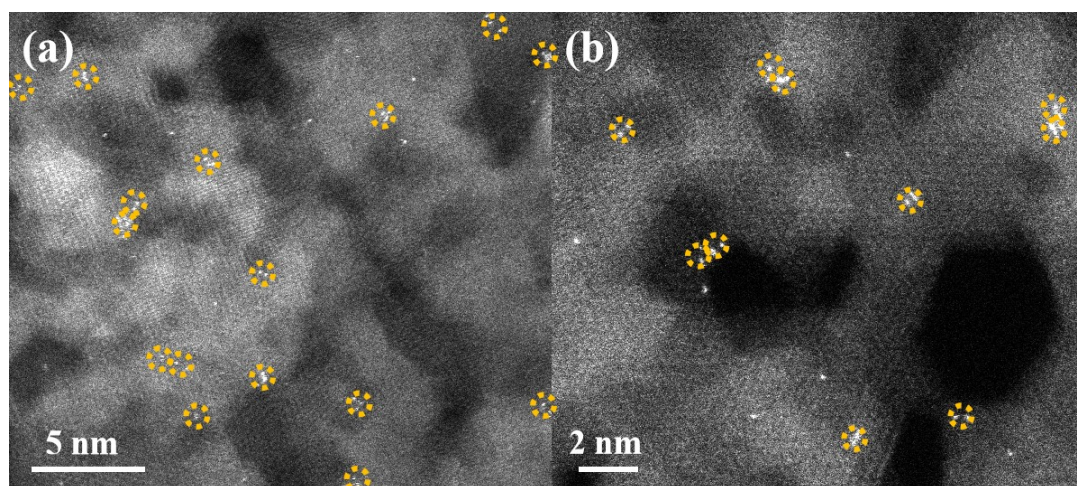

**Figure S2** Aberration-corrected HAADF-STEM images of Pt/MgO@C catalyst.

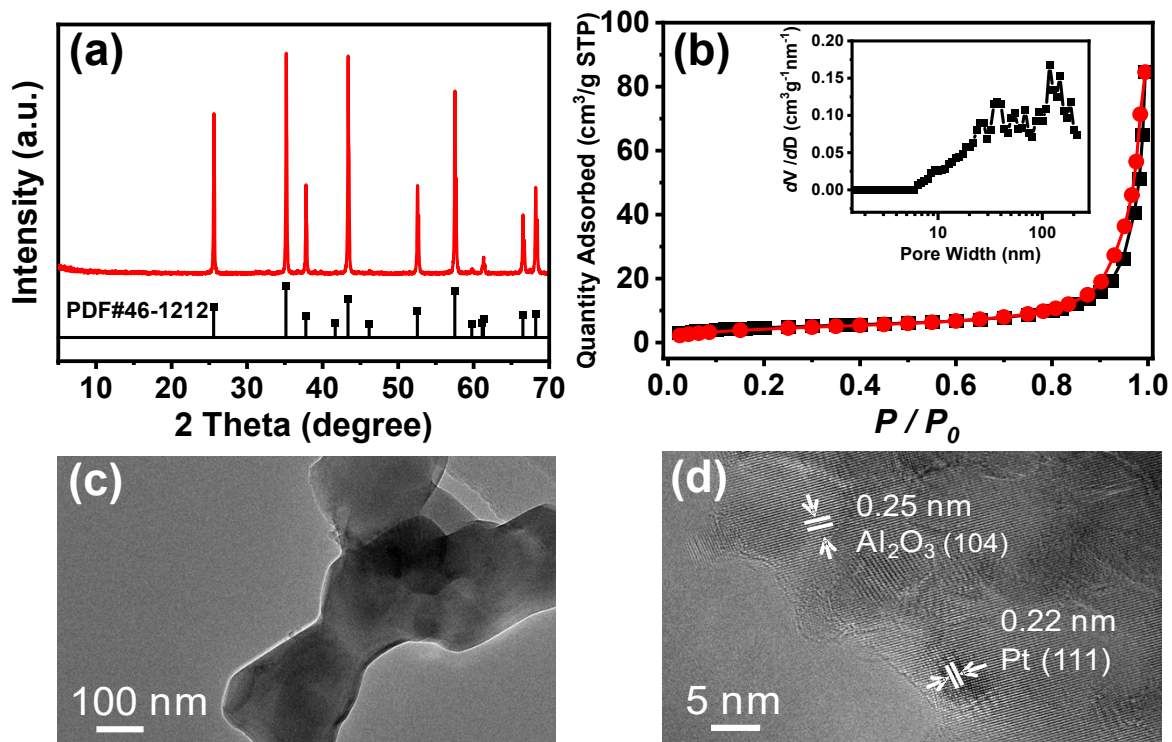

**Figure S3** XRD pattern (a), N<sub>2</sub> adsorption–desorption isotherms and the corresponding pore size distribution (inset) (b), TEM (c), and HRTEM images (d) of the Pt/Al<sub>2</sub>O<sub>3</sub> catalyst.



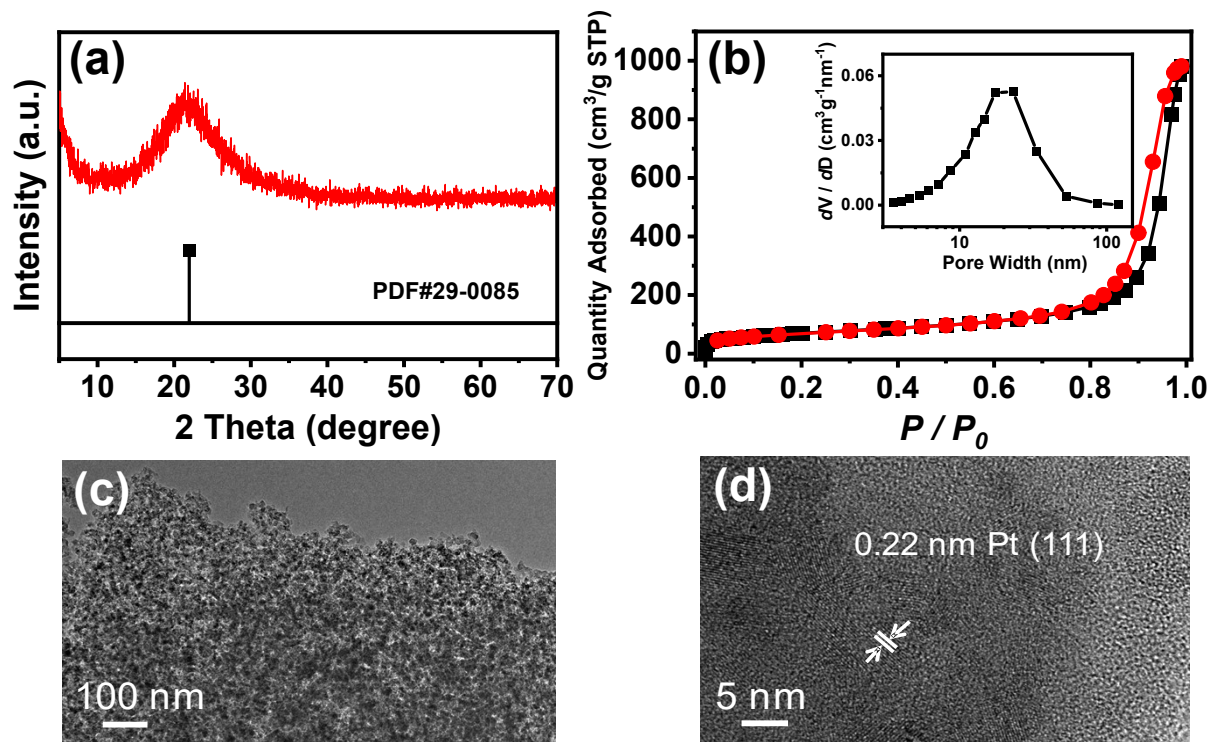

**Figure S4** XRD pattern (a), N<sub>2</sub> adsorption–desorption isotherms and the corresponding pore size distribution (inset) (b), TEM (c), and HRTEM images (d) of the Pt/SiO<sub>2</sub> catalyst.

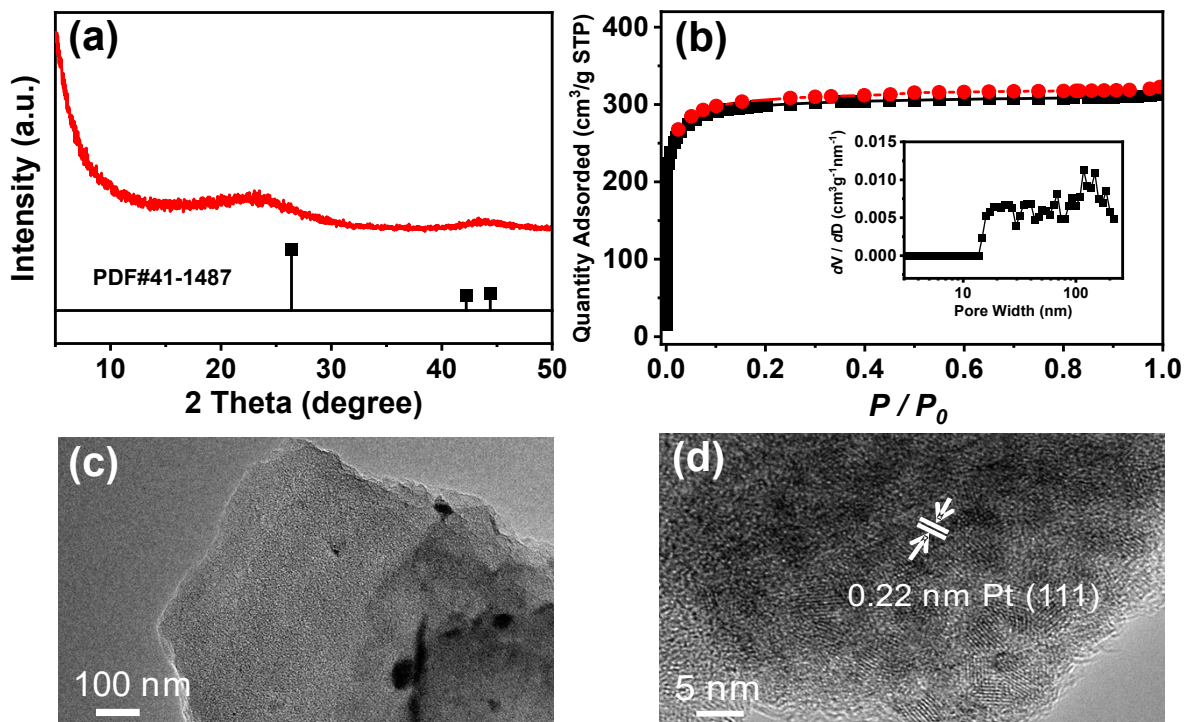

**Figure S5** XRD pattern (a),  $N_2$  adsorption–desorption isotherms and the corresponding pore size distribution (inset) (b), TEM (c), and HRTEM images (d) of the Pt/C catalyst.

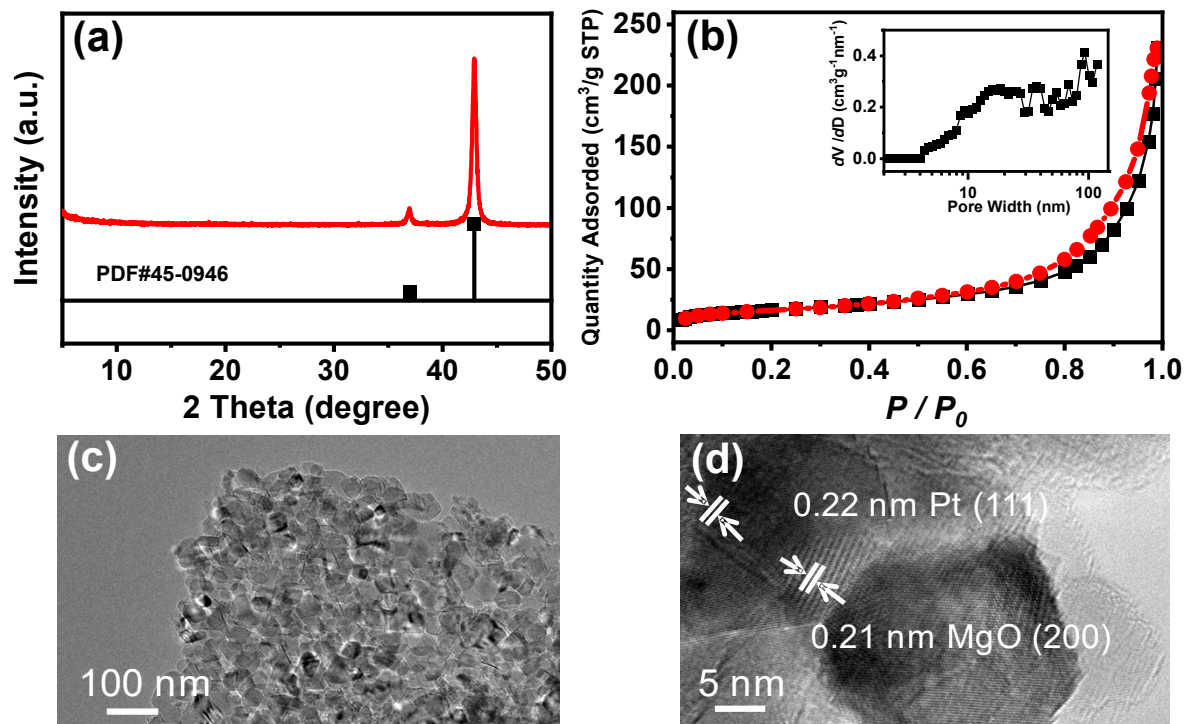

**Figure S6** XRD pattern (a), N<sub>2</sub> adsorption–desorption isotherms and the corresponding pore size distribution (inset) (b), TEM (c), and HRTEM images (d) of the Pt/MgO catalyst.

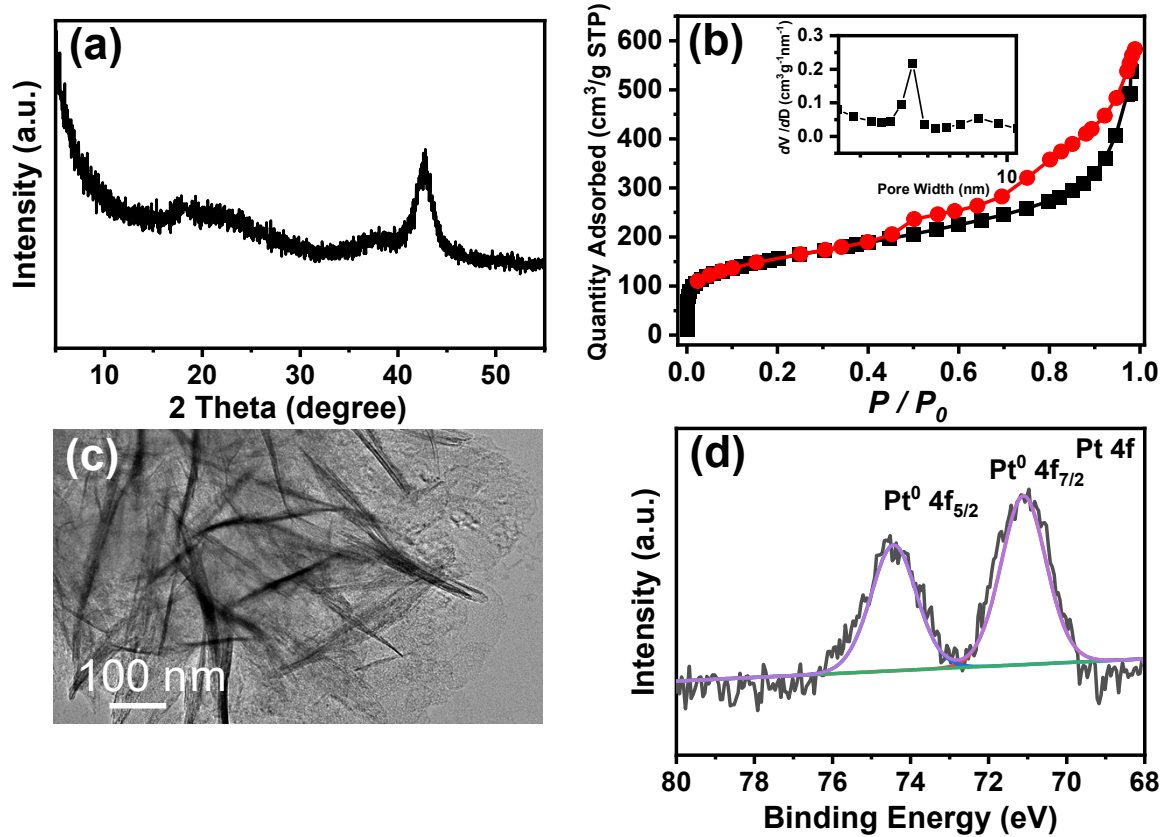

**Figure S7** XRD pattern (a), N<sub>2</sub> adsorption–desorption isotherms and the corresponding pore size distribution (inset) (b), TEM (c), and Pt 4f XPS spectra (d) of the spent Pt/MgO@C catalyst.

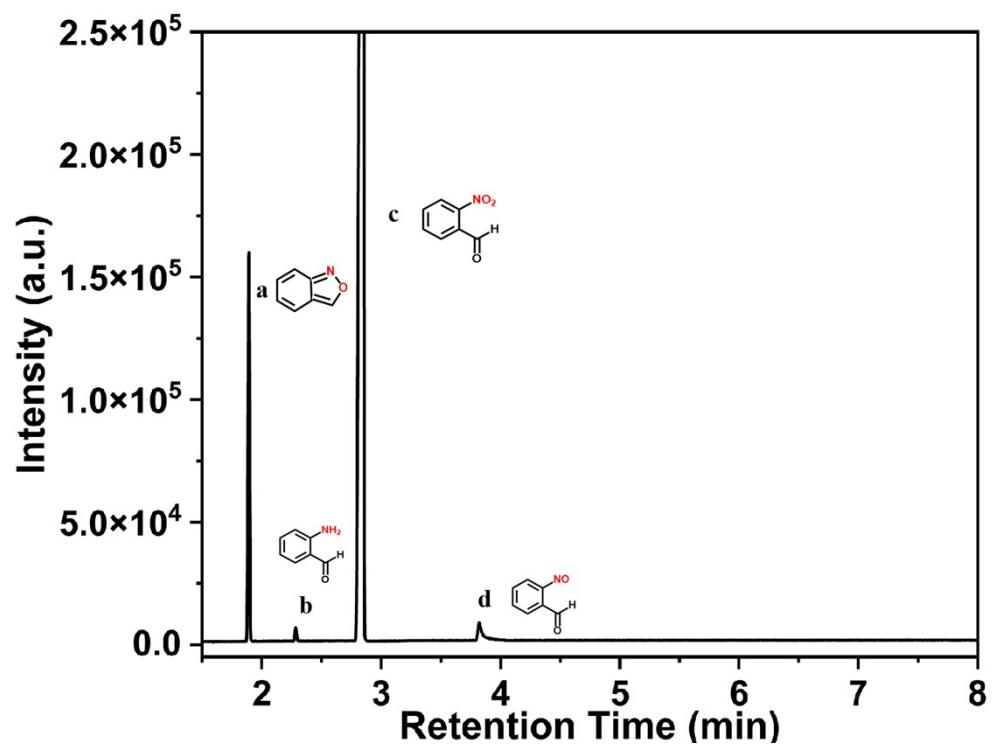

**Figure S8** GC-MS spectrum of reactant, intermediate, and products. Reaction conditions: Pt/MgO@C (50 mg), 2-nitrobenzaldehyde (0.2 mmol), toluene (3 mL), 273 K, 0.5 h, H<sub>2</sub> (1 bar in balloon).

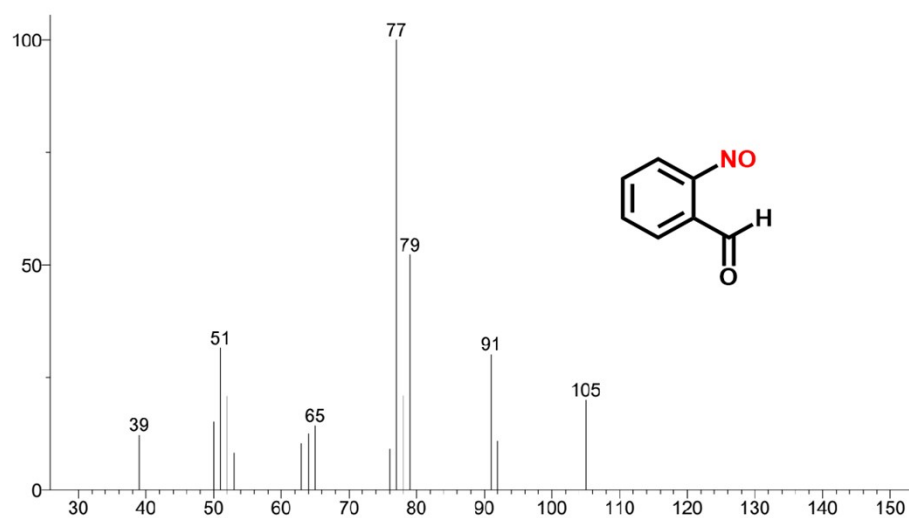

**Figure S9** GC-MS spectrum of nitroso compounds. Reaction conditions: Pt/MgO@C (50 mg), 2-nitrobenzaldehyde (0.2 mmol), toluene (3 mL), 273 K, 0.5 h, H<sub>2</sub> (1 bar in balloon).

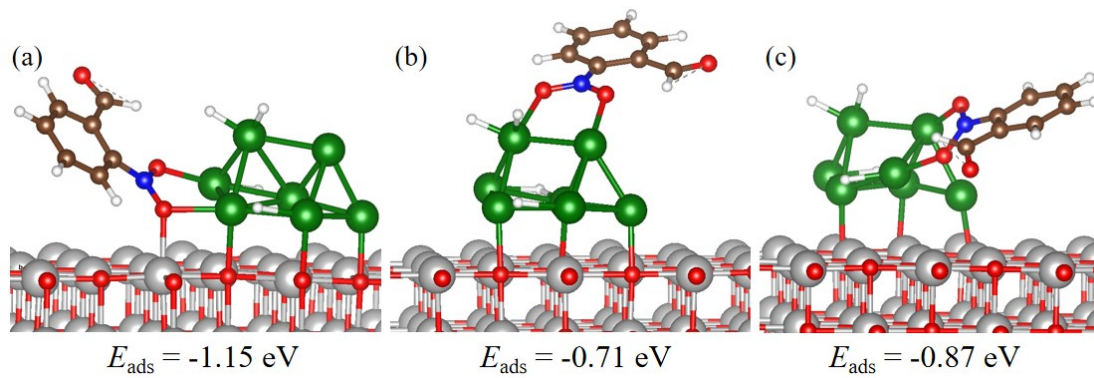

**Figure S10** Stable configurations for the adsorption of 2-nitrobenzaldehyde on Pt<sub>7</sub>/MgO(100) as well as their adsorption energies.

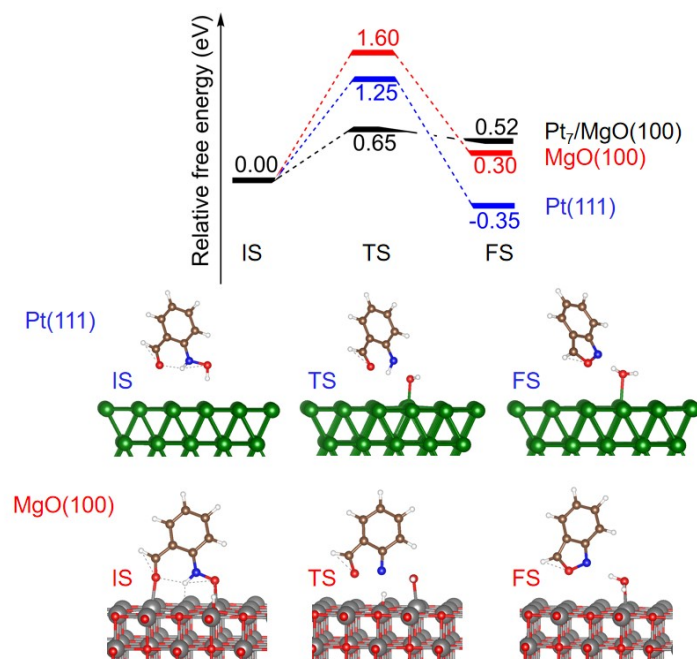

**Figure S11** Comparison of reaction pathways for the heterocyclization reaction of hydroxylamine to 2,1-benzisoxazole on Pt<sub>7</sub>/MgO(100), MgO(100), and Pt(111) surfaces.



## Analytical data of the products

### 2,1-Benzisoxazole [S7]

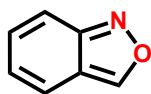

A yellow oil.  $^1\text{H}$  NMR (600 MHz,  $\text{CDCl}_3$ )  $\delta$  9.10 (s, 1H), 7.58 (d,  $J = 9.1$  Hz, 1H), 7.56 (d,  $J = 8.8$  Hz, 1H), 7.26 (dd,  $J = 9.1, 6.3$  Hz, 1H), 6.95 (dd,  $J = 8.8, 6.4$  Hz, 1H).  $^{13}\text{C}$  NMR (151 MHz,  $\text{CDCl}_3$ )  $\delta$  155.95, 154.50, 130.81, 124.28, 119.60, 118.07, 114.80.

### 3-Methyl-2,1-benzisoxazole [S7]

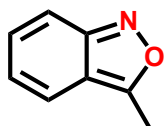

A yellow oil.  $^1\text{H}$  NMR (600 MHz,  $\text{CDCl}_3$ )  $\delta$  7.51 (d,  $J = 8.7$  Hz, 1H), 7.43 (d,  $J = 9.1$  Hz, 1H), 7.27 (dd,  $J = 9.1, 6.3$  Hz, 1H), 6.92 (dd,  $J = 8.7, 6.4$  Hz, 1H), 2.79 (s, 3H).  $^{13}\text{C}$  NMR (151 MHz,  $\text{CDCl}_3$ )  $\delta$  165.74, 157.14, 130.86, 122.85, 119.93, 115.71, 114.94, 12.04.

### 5-Chloro-2,1-benzisoxazole [S8]

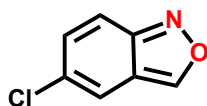

A yellow solid.  $^1\text{H}$  NMR (600 MHz,  $\text{CDCl}_3$ )  $\delta$  9.11 (s, 1H), 7.61 (d,  $J = 9.4$  Hz, 1H), 7.58 (s, 1H), 7.25 (dd,  $J = 9.4, 1.6$  Hz, 1H).  $^{13}\text{C}$  NMR (151 MHz,  $\text{CDCl}_3$ )  $\delta$  154.70, 154.17, 132.89, 130.34, 118.54, 117.91, 116.90.

### 4-Chloro-2,1-benzisoxazole [S9]

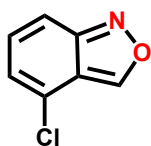

A green solid.  $^1\text{H}$  NMR (600 MHz,  $\text{CDCl}_3$ )  $\delta$  9.19 (s, 1H), 7.52 (d,  $J = 9.0$  Hz, 1H), 7.21 (t,  $J = 9.0$  Hz, 1H), 6.99 (d,  $J = 6.9$  Hz, 1H).  $^{13}\text{C}$  NMR (151 MHz,  $\text{CDCl}_3$ )  $\delta$  156.68, 154.91, 131.22, 125.38, 123.38, 119.53, 113.90.

[1,3]Dioxolo[4,5-f]-2,1-benzisoxazole [S7]

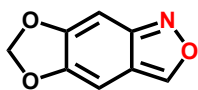

A yellow solid.  $^1\text{H}$  NMR (600 MHz,  $\text{CDCl}_3$ )  $\delta$  8.77 (s, 1H), 6.78 (s, 1H), 6.66 (s, 1H), 5.98 (s, 2H).  $^{13}\text{C}$  NMR (151 MHz,  $\text{CDCl}_3$ )  $\delta$  155.54, 153.00, 152.16, 147.76, 115.37, 101.90, 92.16, 89.68.

6-Methyl-2,1-benzisoxazole [S7]

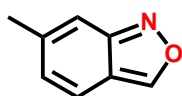

An orange oil.  $^1\text{H}$  NMR (600 MHz,  $\text{CDCl}_3$ )  $\delta$  9.02 (s, 1H), 7.44 (d,  $J = 8.9$  Hz, 1H), 7.34 (s, 1H), 6.84 (d,  $J = 8.1$  Hz, 1H), 2.39 (s, 3H).  $^{13}\text{C}$  NMR (151 MHz,  $\text{CDCl}_3$ )  $\delta$  156.85, 153.97, 141.35, 127.98, 119.09, 117.14, 112.51, 22.50.

6-Chloro-2,1-benzisoxazole [S7]

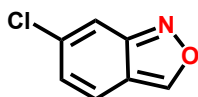

A pale-yellow solid.  $^1\text{H}$  NMR (600 MHz,  $\text{CDCl}_3$ )  $\delta$  9.11 (s, 1H), 7.62 (s, 1H), 7.52 (d,  $J = 9.2$  Hz, 1H), 6.95 (dd,  $J = 9.2, 1.6$  Hz, 1H).  $^{13}\text{C}$  NMR (151 MHz,  $\text{CDCl}_3$ )  $\delta$  156.28, 155.22, 137.33, 126.72, 121.12, 116.79, 113.78.

5-Bromo-2,1-benzisoxazole [S10]

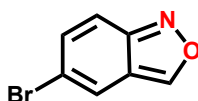

An orange solid.  $^1\text{H}$  NMR (600 MHz,  $\text{CDCl}_3$ )  $\delta$  9.12 (d,  $J = 1.1$  Hz, 1H), 7.77 (d,  $J = 2.9$  Hz, 1H), 7.54 (ddd,  $J = 9.5, 4.5, 0.9$  Hz, 1H), 7.35 (ddd,  $J = 9.3, 4.9, 1.6$  Hz, 1H).  $^{13}\text{C}$  NMR (151 MHz,  $\text{CDCl}_3$ )  $\delta$  154.57, 154.01, 134.93, 121.53, 119.31, 118.21, 116.88.

4-Bromo-2,1-benzisoxazole [S8]

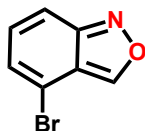

A pale-yellow solid.  $^1\text{H}$  NMR (600 MHz,  $\text{CDCl}_3$ )  $\delta$  9.08 (s, 1H), 7.52-7.50 (m, 1H), 7.13-7.07 (m, 2H).  $^{13}\text{C}$  NMR (151 MHz,  $\text{CDCl}_3$ )  $\delta$  156.27, 156.23, 131.54, 126.93, 121.05, 114.41, 112.63.

5-Methoxy-2,1-benzisoxazole [S11]

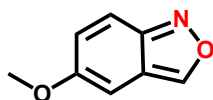

A yellow oil.  $^1\text{H}$  NMR (600 MHz,  $\text{CDCl}_3$ )  $\delta$  8.91 (s, 1H), 7.51 (d,  $J = 9.6$  Hz, 1H), 7.01 (dd,  $J = 9.6, 1.6$  Hz, 1H), 6.60 (s, 1H), 3.80 (s, 3H).  $^{13}\text{C}$  NMR (151 MHz,  $\text{CDCl}_3$ )  $\delta$  156.28, 154.47, 152.37, 128.27, 118.39, 116.62, 92.86, 55.44.

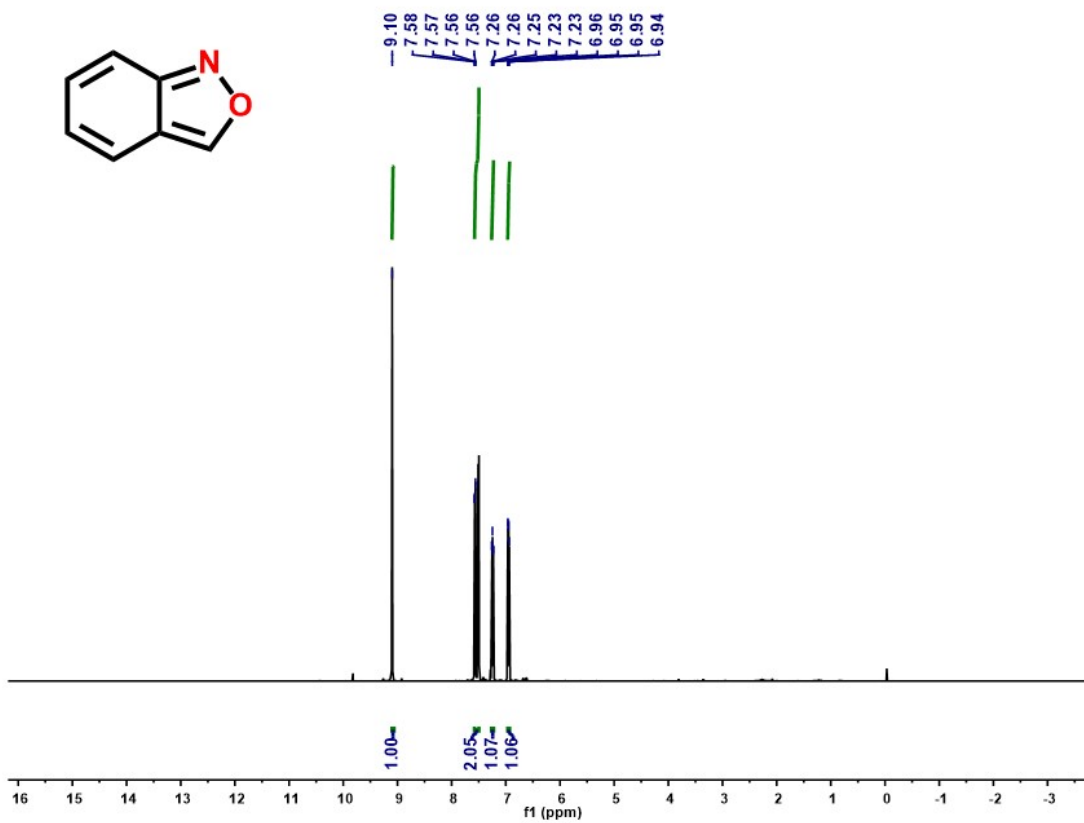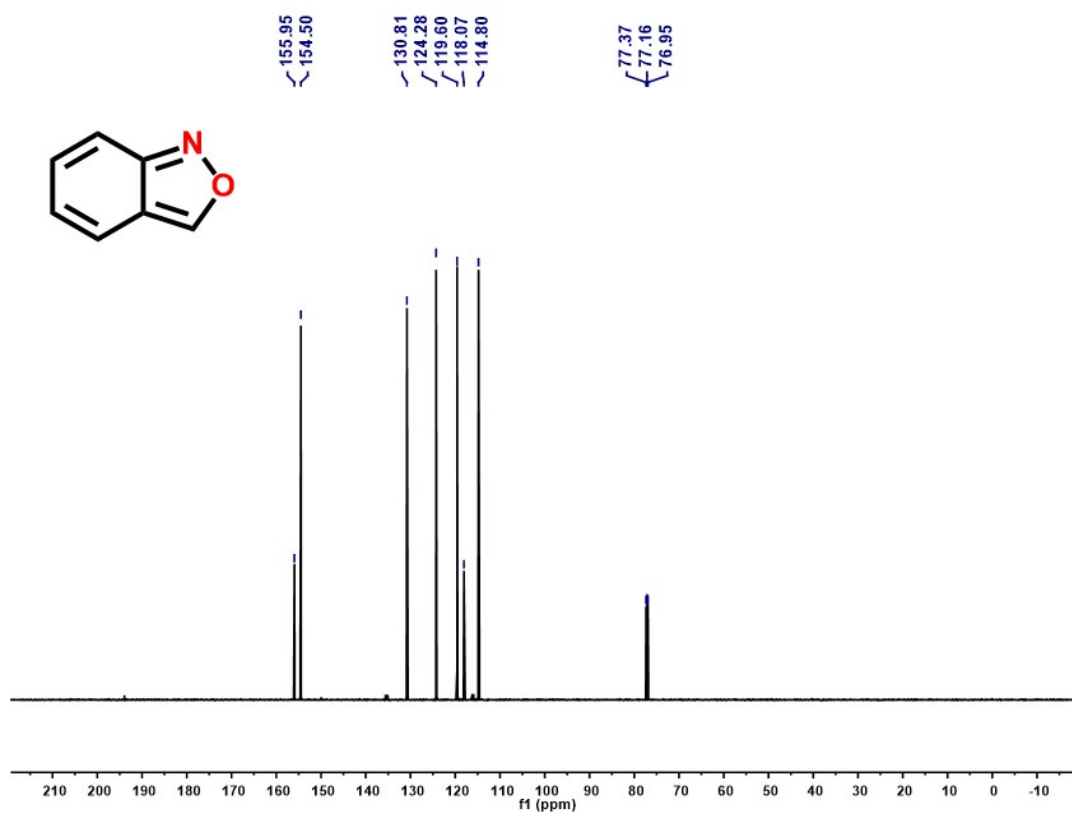

Figure S12  $^1\text{H}$  and  $^{13}\text{C}$  NMR spectra for 2,1-benzisoxazole.

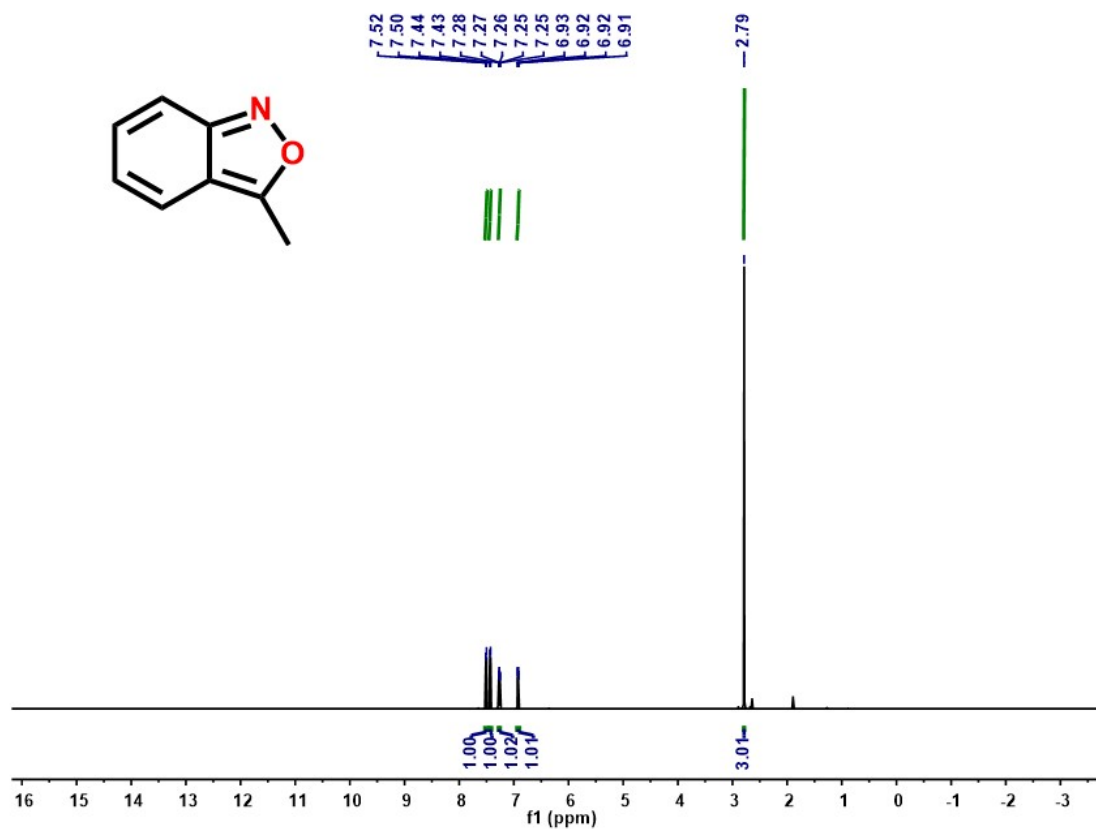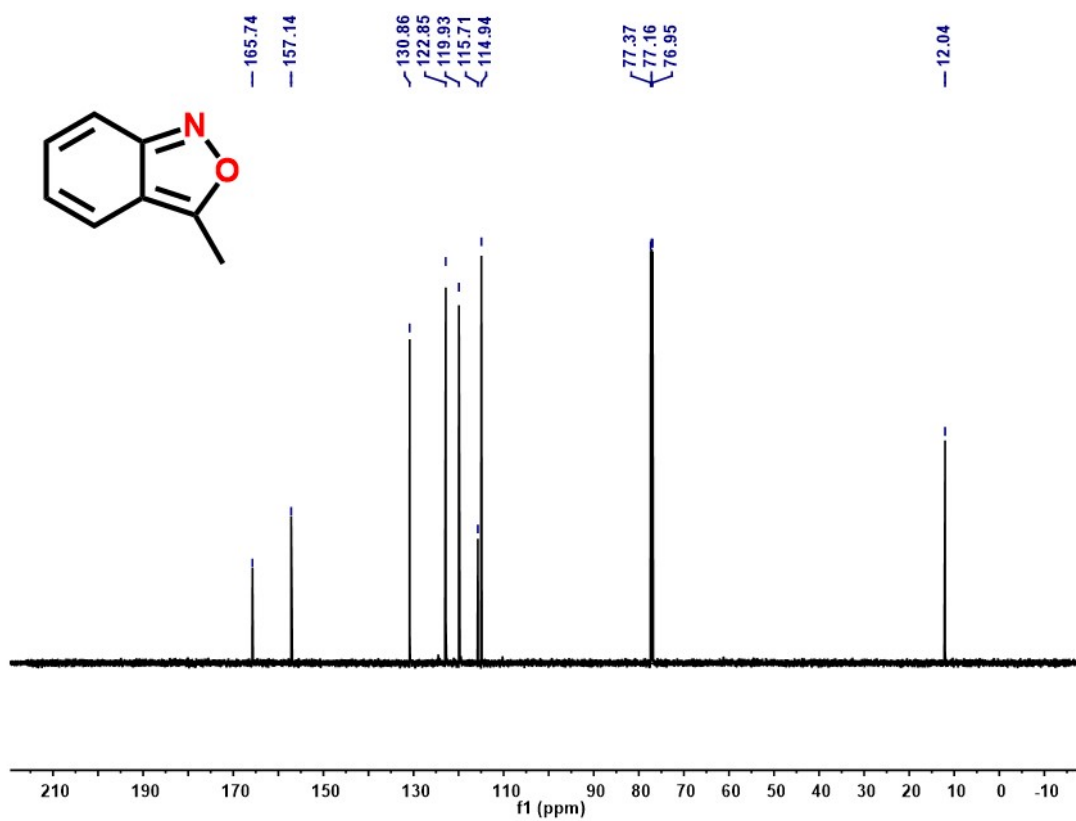

Figure S13 <sup>1</sup>H and <sup>13</sup>C NMR spectra for 3-methyl-2,1-benzisoxazole.

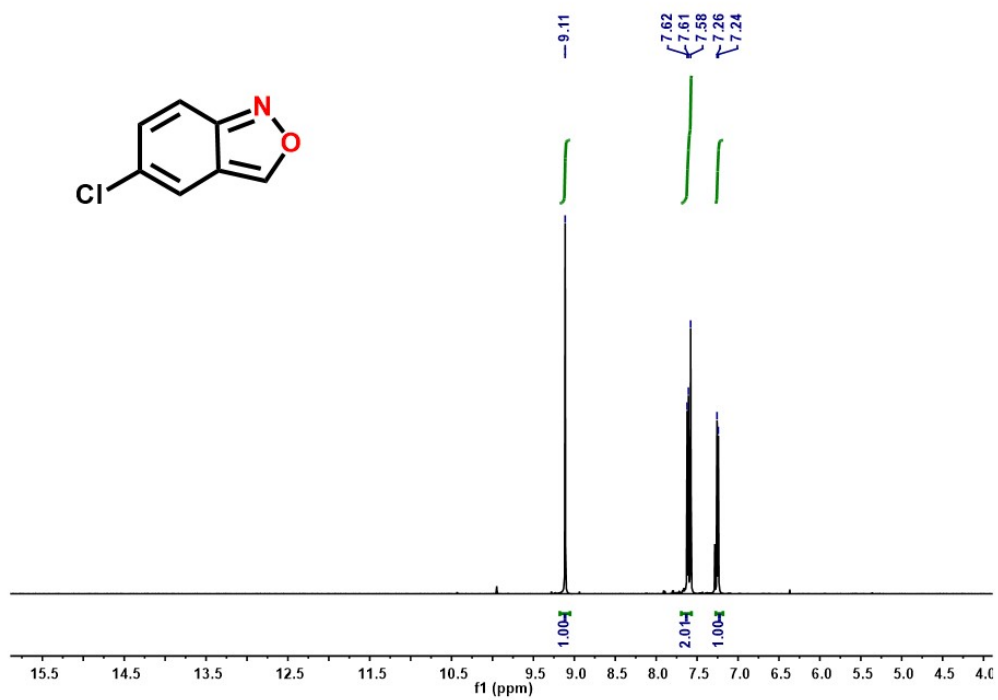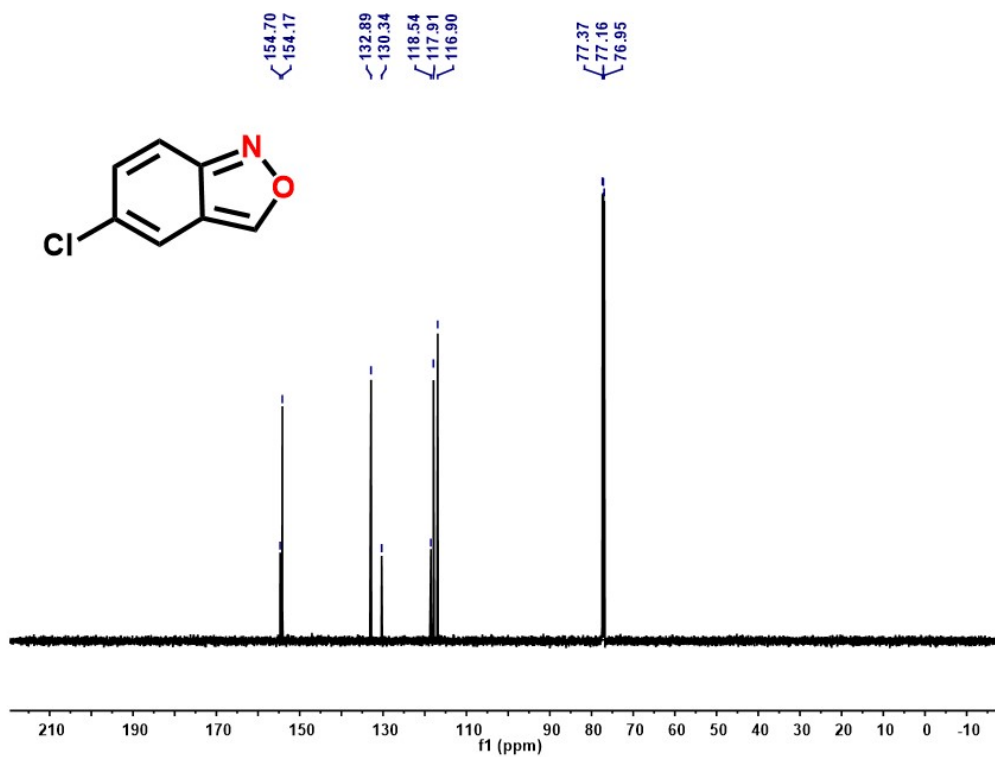

Figure S14  $^1\text{H}$  and  $^{13}\text{C}$  NMR spectra for 5-chloro-2,1-benzisoxazole.

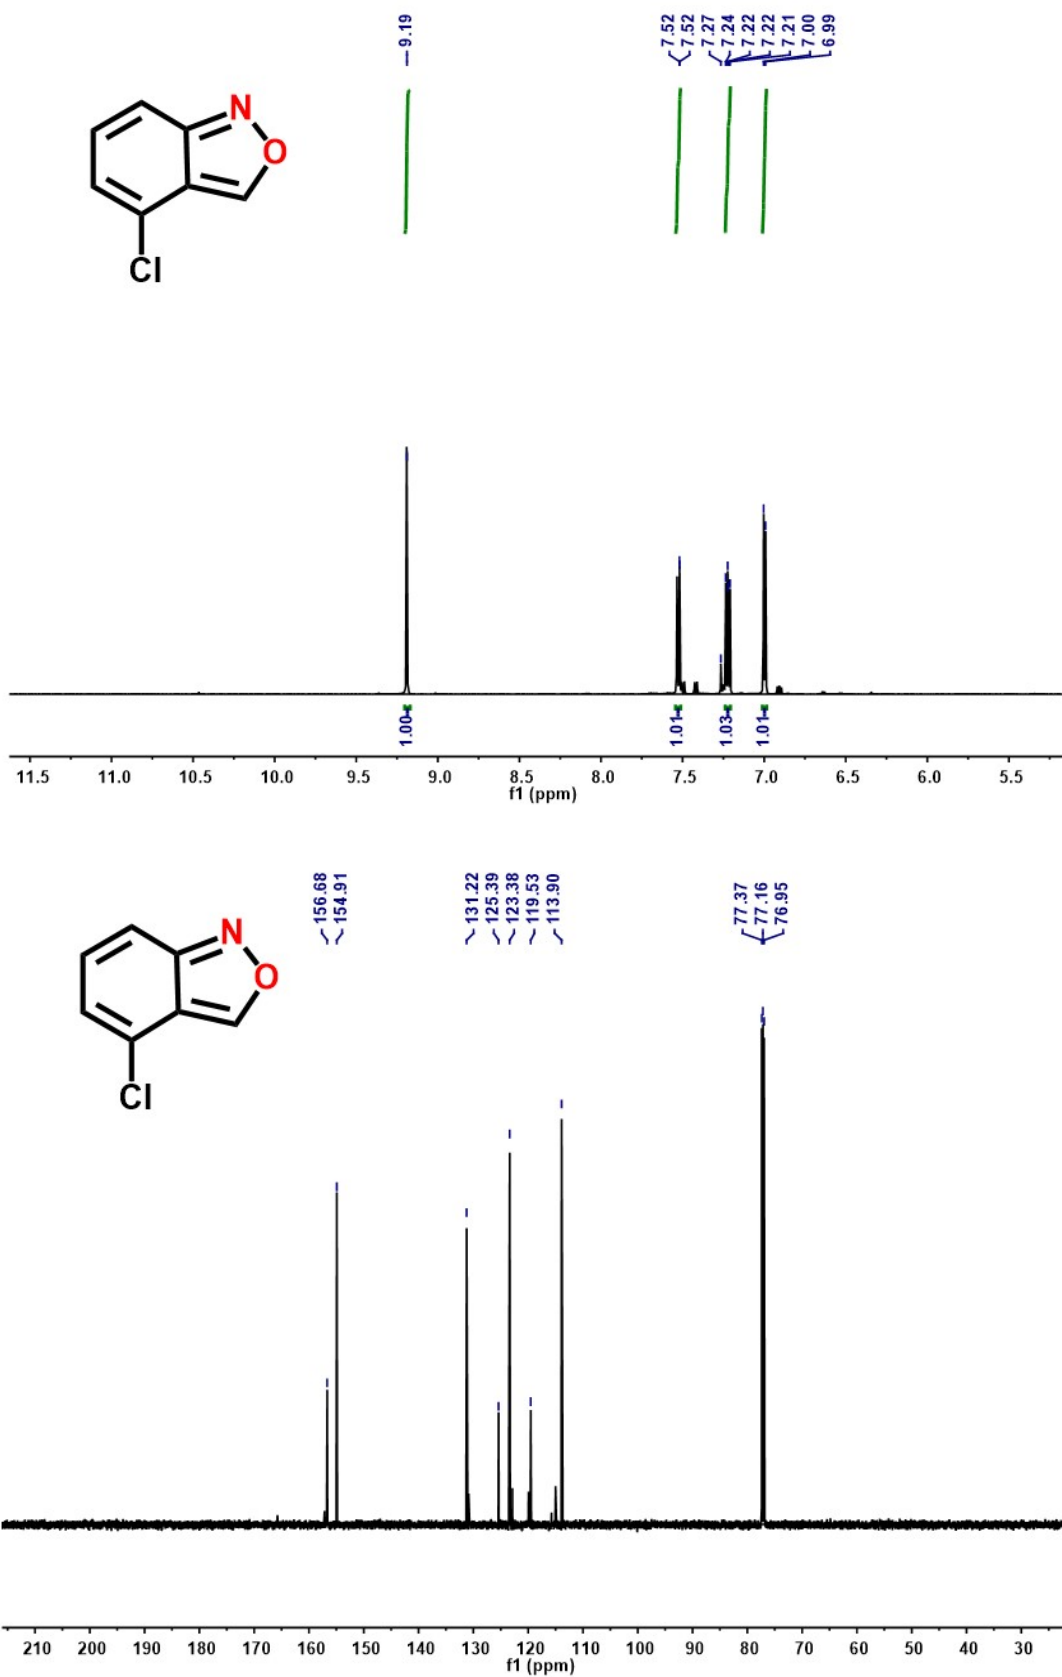

**Figure S15** <sup>1</sup>H and <sup>13</sup>C NMR spectra for 4-chloro-2,1-benzisoxazole.

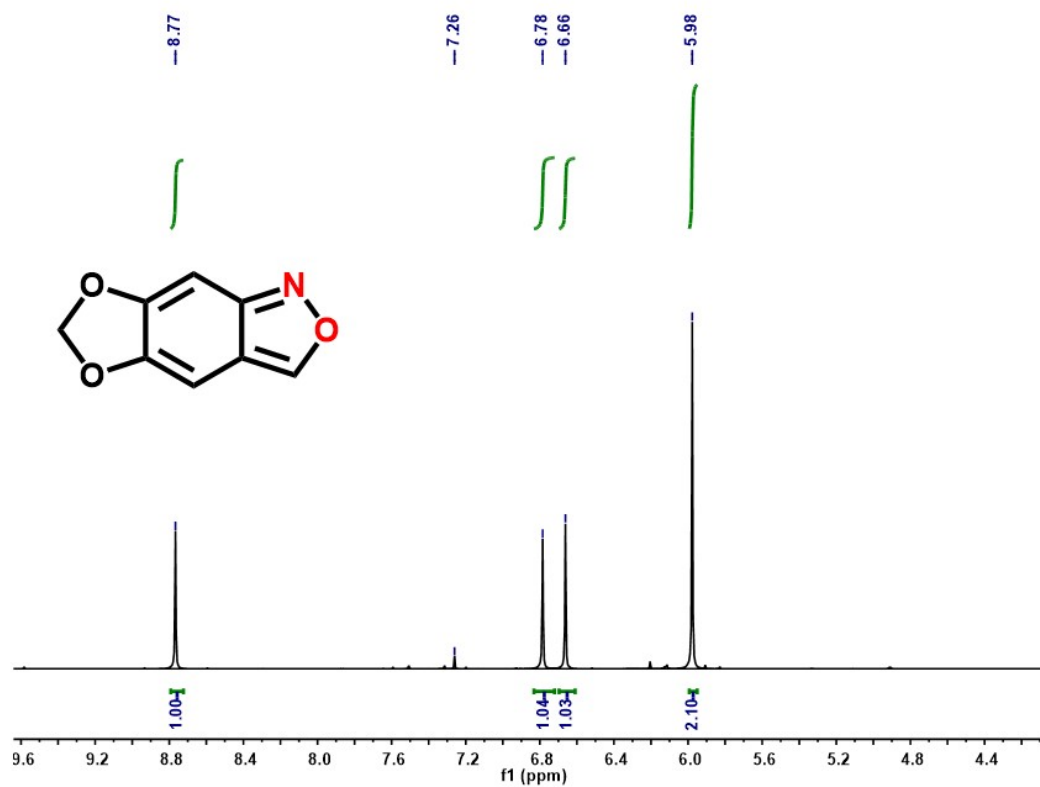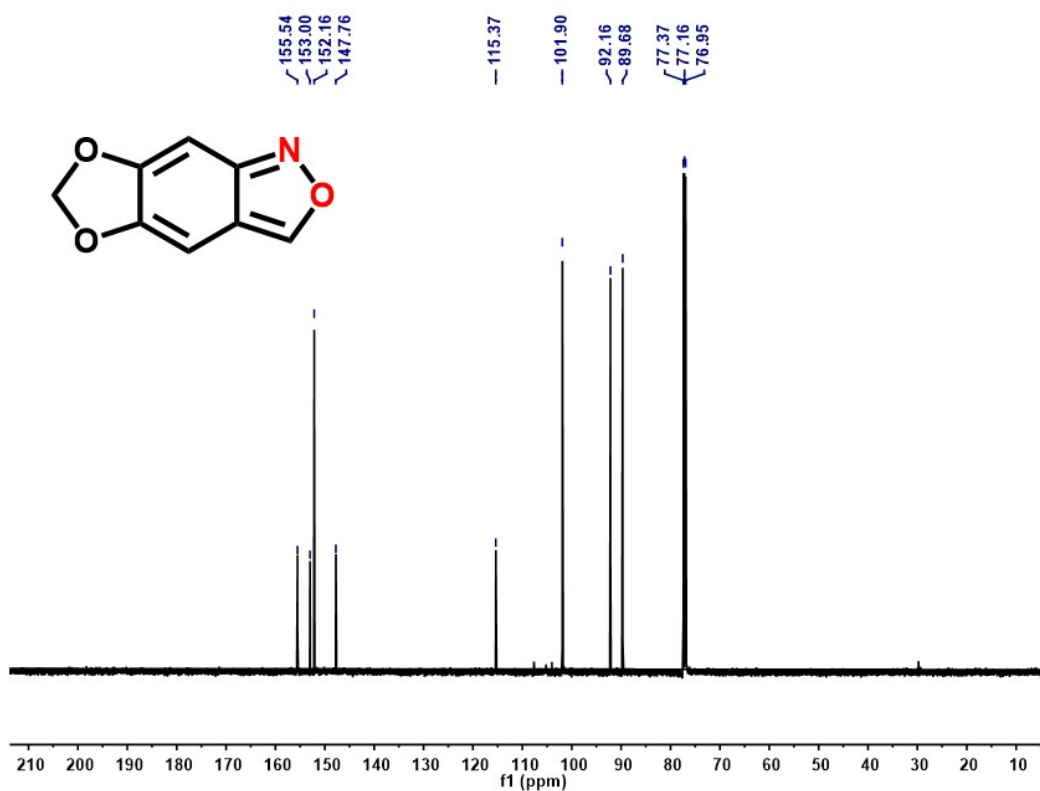

Figure S16 <sup>1</sup>H and <sup>13</sup>C NMR spectra for [1,3]dioxolo[4,5-f]-2,1-benzisoxazole.



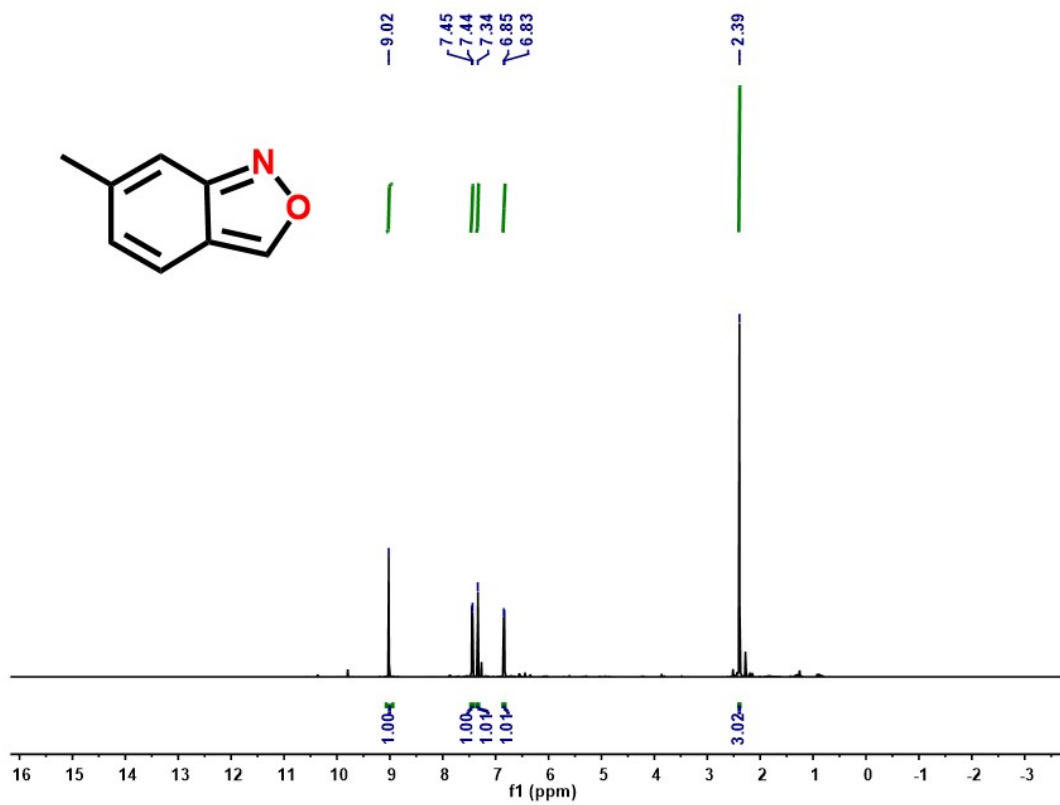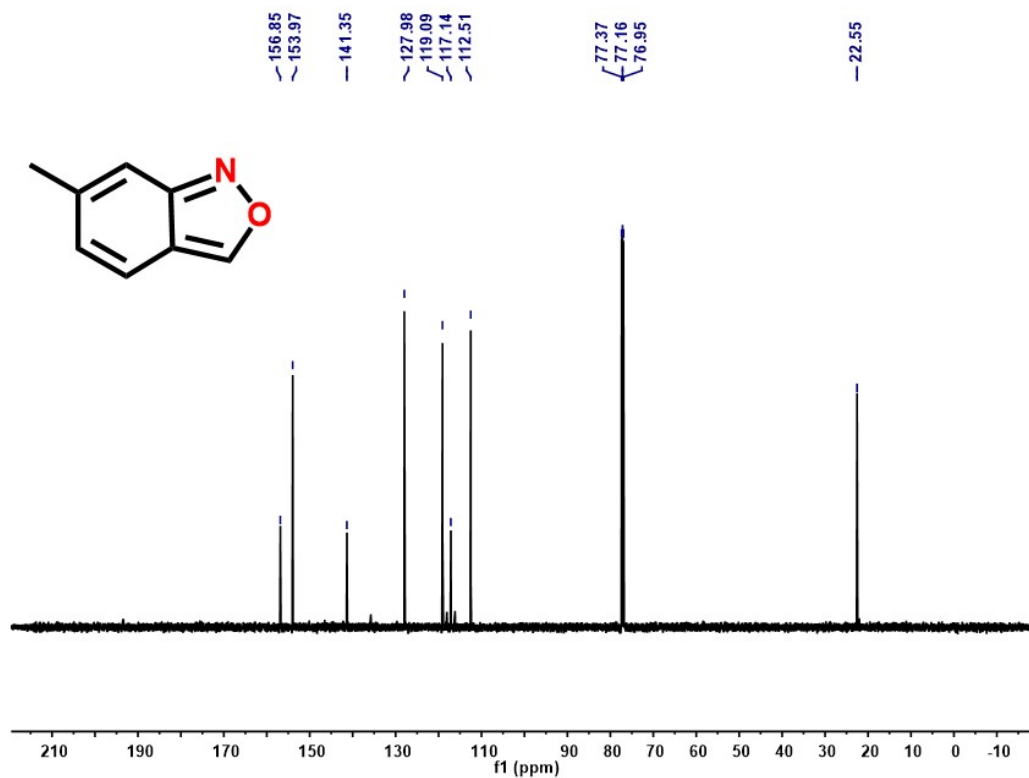

Figure S17  $^1\text{H}$  and  $^{13}\text{C}$  NMR spectra for 6-methyl-2,1-benzisoxazole.

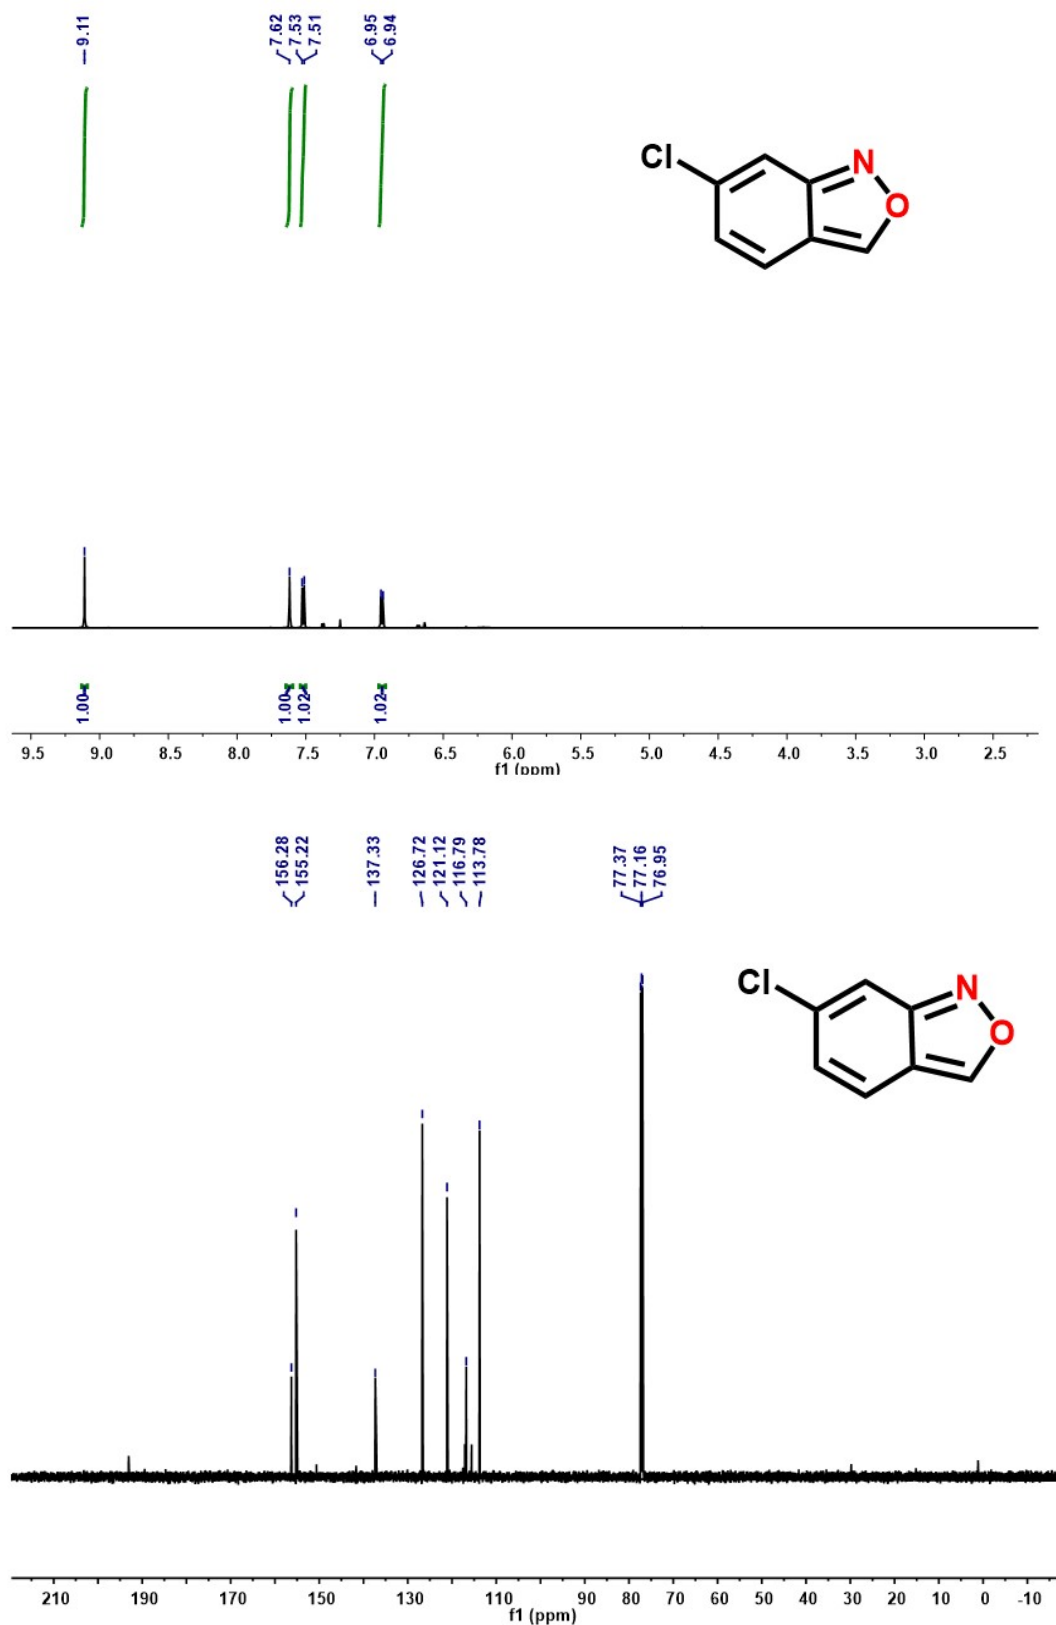

Figure S18 <sup>1</sup>H and <sup>13</sup>C NMR spectra for 6-chloro-2,1-benzisoxazole.

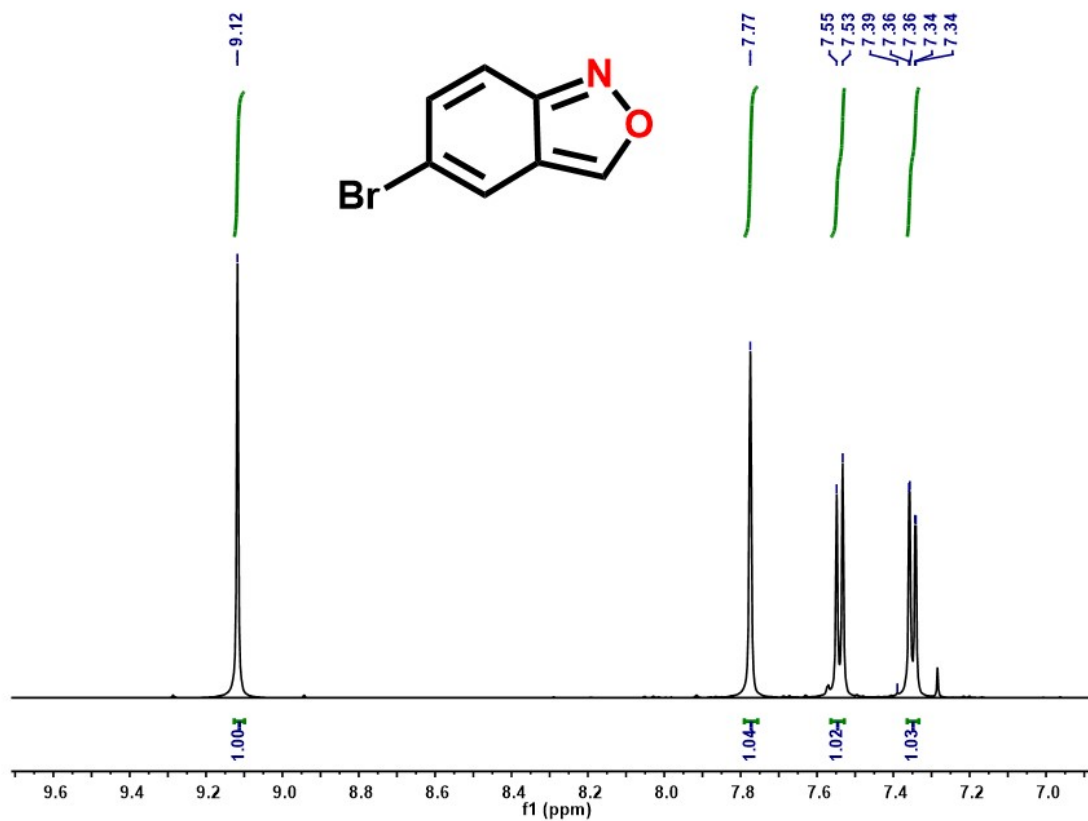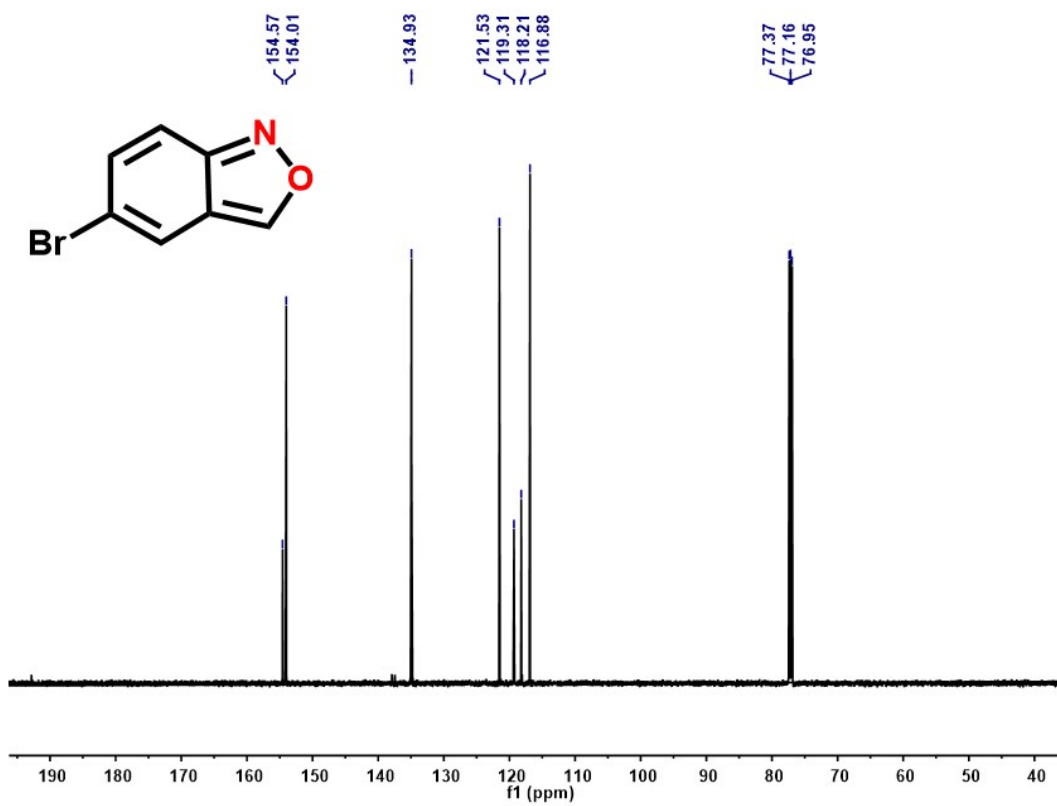

Figure S19 <sup>1</sup>H and <sup>13</sup>C NMR spectra for 5-bromo-2,1-benzisoxazole.

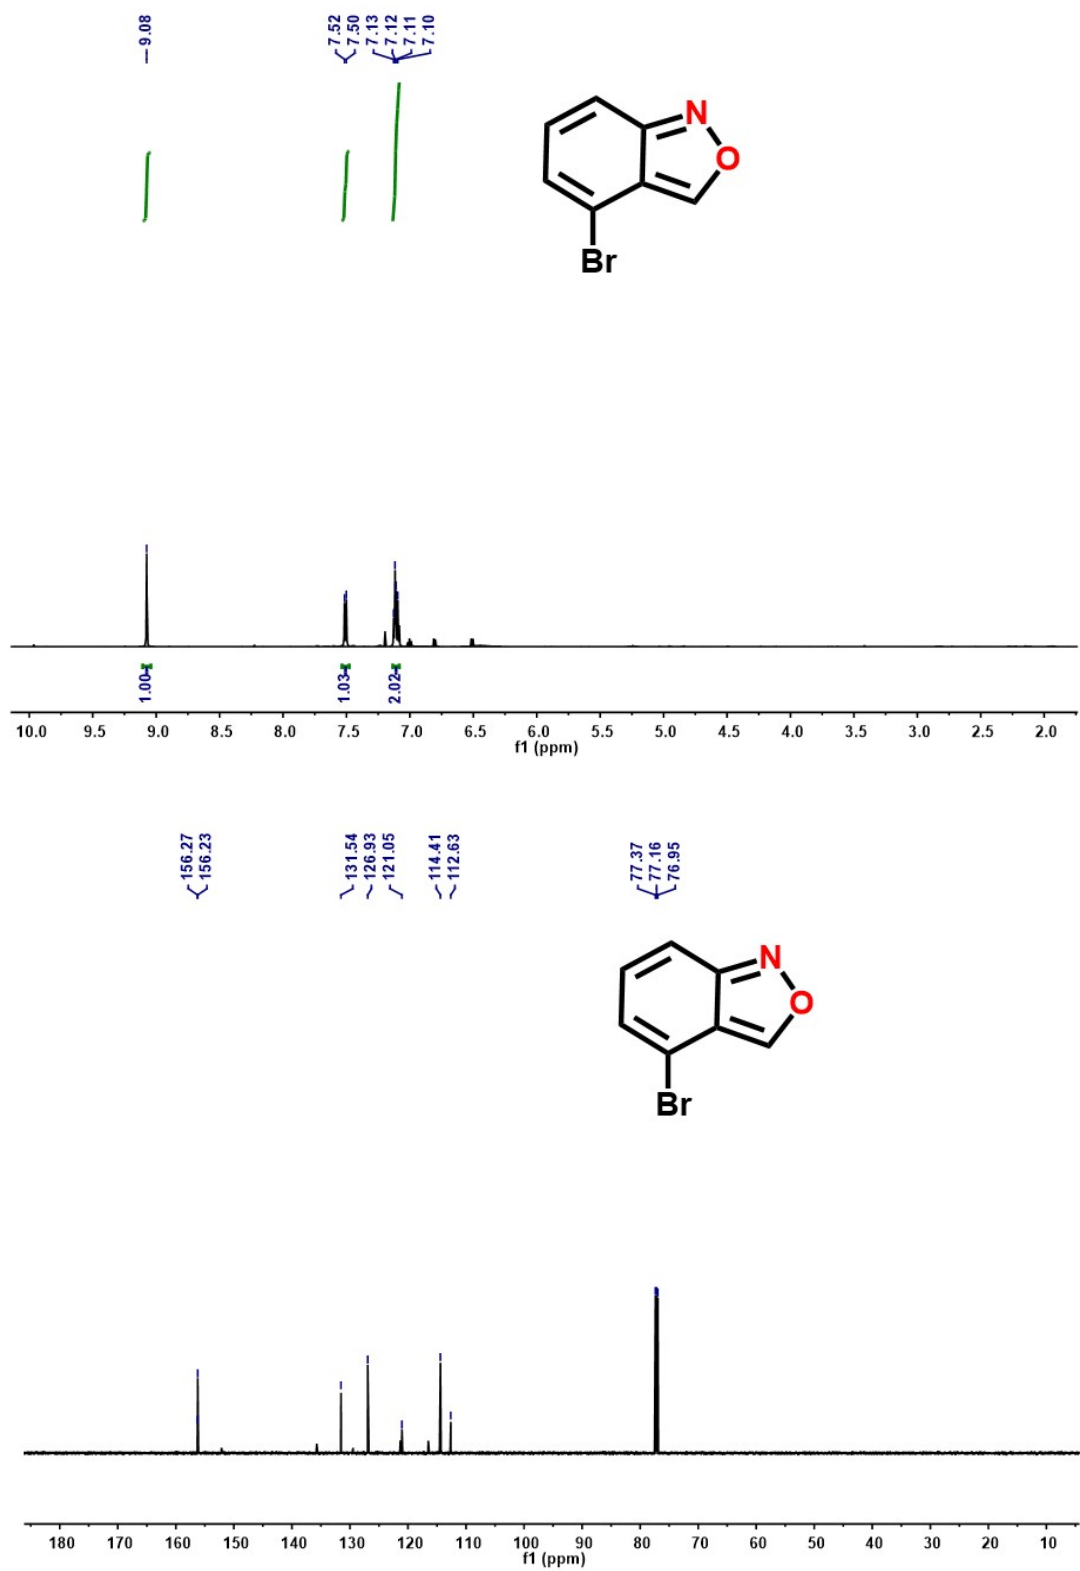

Figure S20 <sup>1</sup>H and <sup>13</sup>C NMR spectra for 4-bromo-2,1-benzisoxazole.

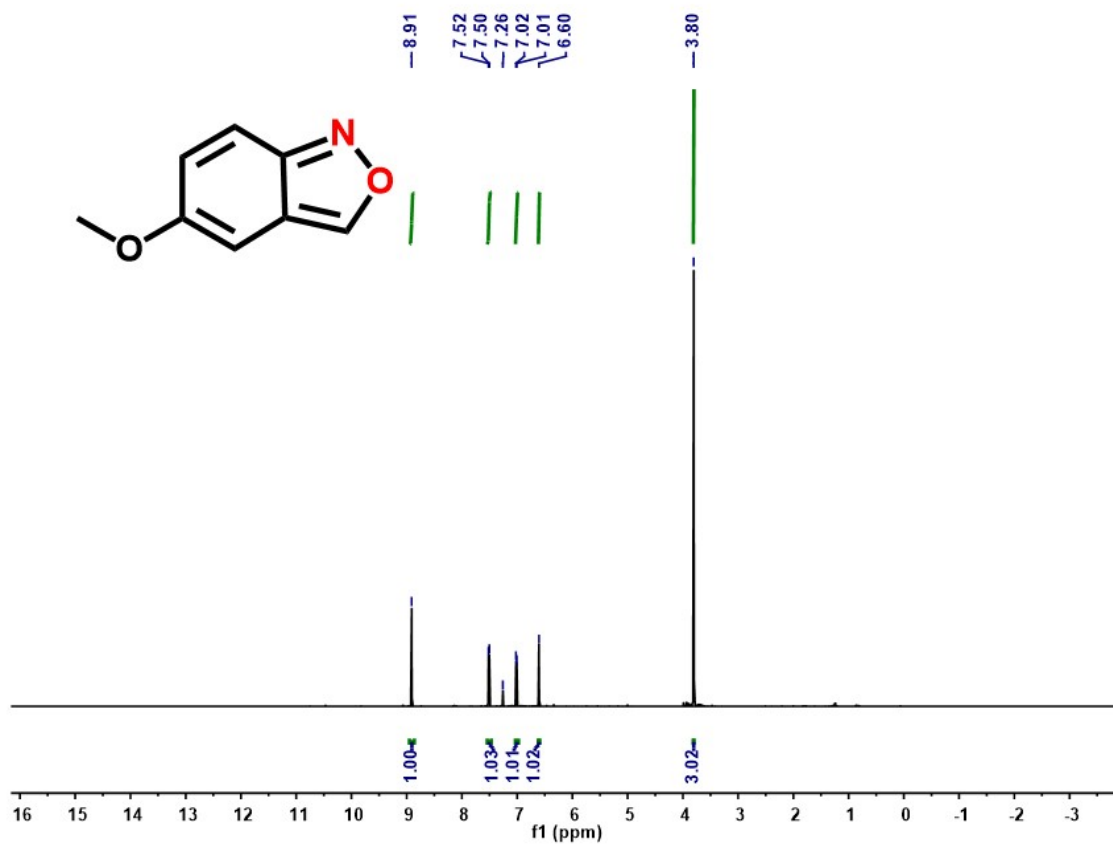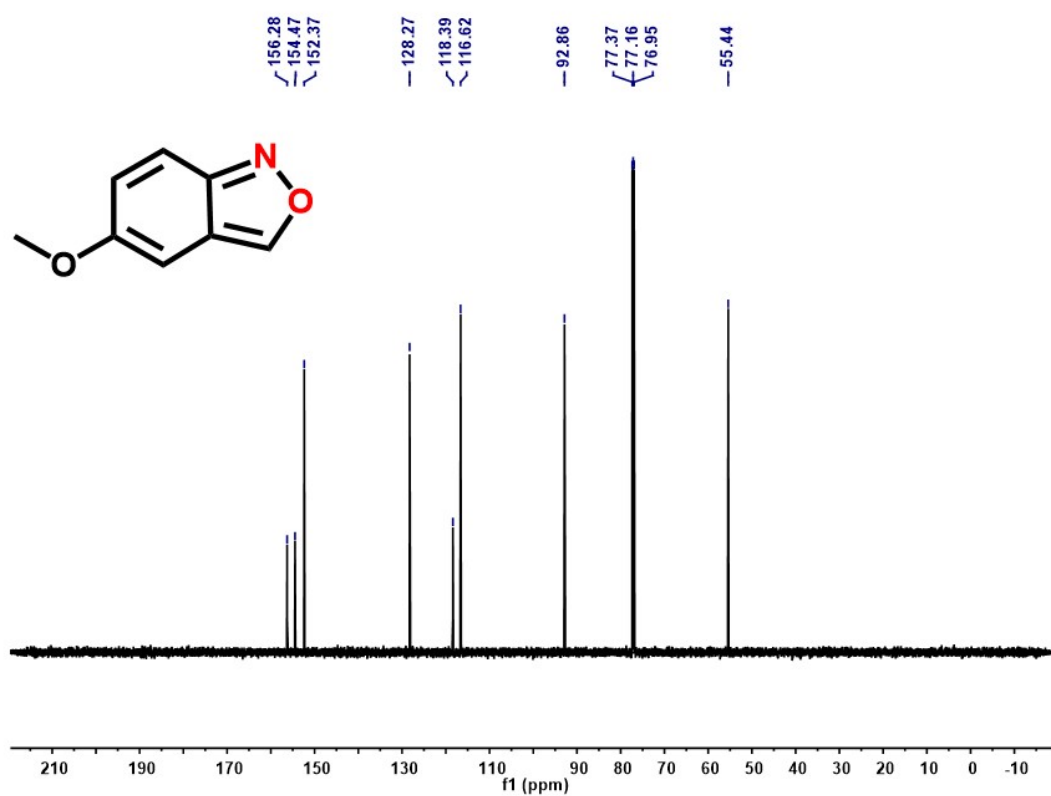

**Figure S21** <sup>1</sup>H and <sup>13</sup>C NMR spectra for 5-methoxy-2,1-benzisoxazole.

## References

- [S7] S. Hosseini, S. A. Bawel, M. S. Mubarak and D. G. Peters, *ChemElectroChem*, 2018, **6**, 4318–4324.
- [S8] H. M. Jin, L. Huang, J. Xie, M. Rudolph, F. Rominger and A. S. K. Hashmi, *Angew. Chem. Int. Ed.*, 2016, **55**, 794–797.
- [S9] P. Raju, G. G. Rajeshwaran, M. Nandakumar and A. K. Mohanakrishnan, *Eur. J. Org. Chem.*, 2015, **2015**, 3513–3523.
- [S10] Q. Cheng, J.-H. Xie, Y.-C. Weng and S.-L. You, *Angew. Chem. Int. Ed.*, 2019, **58**, 5739–5743.
- [S11] R. L. Sahani and R.-S. Liu, *Angew. Chem. Int. Ed.*, 2017, **56**, 12736–12740.
